# Supplementary material for: Aggregation-induced fluorescent response of urea-bearing polyphenyleneethynylenes toward anion sensing
Source: PubMed Central journal article supplement (PMC8344232; doi:10.1080/14686996.2021.1942982), 2021-06-16
Supplement: TSTA_A_1942982_SM6663.pdf [file TSTA_A_1942982_SM6663.pdf]

# **Aggregation-induced Fluorescent Response of Urea-bearing Polyphenyleneethynylenes toward Anion Sensing**

Jian Li,<sup>a,b</sup> Muhammad Saleem,<sup>a</sup> Qian Duan,<sup>c</sup> Toyoji Kakuchi,<sup>c,d</sup> and Yougen Chen<sup>a\*</sup>

<sup>a</sup> Institute for Advanced Study, Shenzhen University, Shenzhen, 518060, China

<sup>b</sup> College of Physics and Optoelectronic Engineering, Shenzhen University, Shenzhen, 518060, China

<sup>c</sup> School of Materials Science and Engineering, Changchun University of Science and Technology, Weixing Road 7989, Jilin, 130022, China

<sup>d</sup> Frontier Chemistry Center, Faculty of Engineering, Hokkaido University, Sapporo, Hokkaido, 060-8628, Japan

CORRESPONDING AUTHOR FOOTNOTE

Tel & Fax: +86-75526943283

E-mail: [chenyg@szu.edu.cn](mailto:chenyg@szu.edu.cn)

## Experimental Section

**Materials.** Dichloromethane ( $\text{CH}_2\text{Cl}_2$ , >99%), acetone (>98%), deuterated chloroform ( $\text{CDCl}_3$ , >99.8%), acetone- $d_6$  ( $\text{CD}_3\text{COCD}_3$ , >99.8%), *n*-hexane (98%), tetrahydrofuran (THF, >99%), methanol (MeOH, >98%), toluene (99%), triethylamine (>99.0%), 3,5-dibromoaniline, triisopropylsilylacetylene, trimethylsilylacetylene and sodium hydride (60 wt% in mineral oil) were purchased from TCI Chemicals. Hexyl isocyanate, bis(triphenylphosphine)palladium(II) dichloride were purchased from Aldrich. All other reagents were used as received. Toluene and THF were distilled over Na/benzophenone under an argon atmosphere and degassed by three freeze-pump-thaw cycles prior to use. All other chemicals were purchased from available suppliers and used without further purification.

**Measurements.** The polymerization was carried out in an MIKROUNA stainless steel glove-box equipped with a gas purification system under a dry argon atmosphere ( $\text{H}_2\text{O}$ ,  $\text{O}_2 < 0.01$  ppm). The moisture and oxygen contents in the glove box were monitored by an MB-MO-SE 1 and an MB-OX-SE 1 sensor, respectively. The  $^1\text{H}$  and  $^{13}\text{C}$  NMR spectroscopy (600 MHz) was recorded using a BRUKER ASCEND TM 600, Bruker Biospin GmbH Rheinstetten, Germany. Size exclusion chromatography (SEC) in DMF was performed at 40 °C at the flow rate of 0.35 mL  $\text{min}^{-1}$  using a Tosoh HLC-8320 GPC System equipped with two TSK gel Super Multipore HZ-M columns (4.6 mm I.D.  $\times$  15 cm  $\times$  2), an EcoSEC GPC System with an RI detector (+0.5s), a UV-8320 detector (254nm, +0.5s), a GPC Workstation EcoSEC-WS, and an Auto sampler, to which 10  $\mu\text{L}$  of sample is injected with the concentration of 0.2 wt%. The number-average molecular weight ( $M_{n, \text{SEC}}$ ) and polydispersity ( $M_w/M_n$ ) of the polymers were calculated based on polystyrene standards. The UV-vis absorption spectra of the polymers were measured by a UV-Vis spectrophotometer (Routine UV-Vis, Cary 60, Agilent) and the fluorescence spectra were

recorded using a fluorescence spectrophotometer (RF-5301PC, Shimadzu). The particle size distribution and average hydrodynamic diameter were measured by a dynamic light scattering method (NanoBrook 90PlusPALS zeta sizer, Brookhaven Instruments). FT-IR spectra were recorded on a Perkin Elmer Frontier. Samples fashioned into KBr pellet disks were placed into a holder for transmission IR spectral analysis. Spectra of mid infrared from an accumulation of 16 scans in the range of 4000–450  $\text{cm}^{-1}$  were recorded.

### Synthesis of 3,5-bis(triisopropylsilylethynyl)aniline

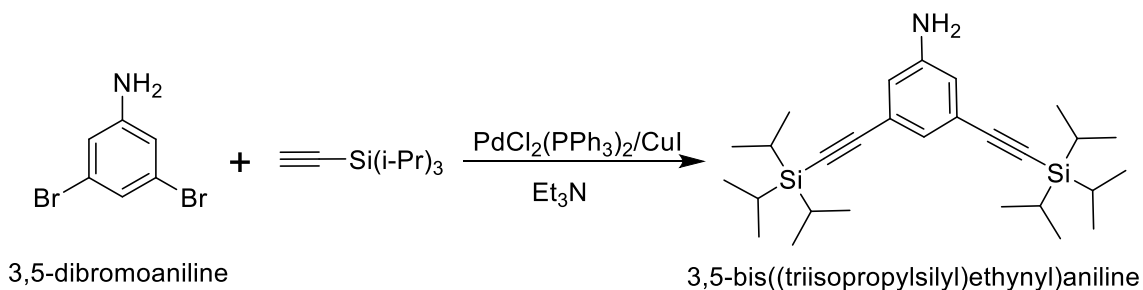

15.00 g (59.71 mmol) 3,5-dibromoaniline, 3.96 (5.64 mmol)  $\text{Pd}(\text{PPh}_3)_2\text{Cl}_2$  and 2.16 g (11.32 mmol)  $\text{CuI}$  were dissolved in a mixture of 140 mL triethylamine and 150 mL toluene. The mixture was heated to 80 °C under argon. 21.96 g (117.78 mmol) triisopropylsilyl acetylene was added dropwise (orange suspension turns dark brown) and the mixture was stirred at 80 °C overnight. Water was added to the mixture and the organic phase was washed with satd.  $\text{NH}_4\text{Cl}$  (aq), 1 N  $\text{HCl}$ (aq), 10%  $\text{Na}_2\text{CO}_3$  (aq), and dried over  $\text{MgSO}_4$ . After evaporation of the solvent, the crude product was purified by column chromatography using firstly hexane and then a 10:1 mixture of petrol ether and ethyl acetate as eluent to yield 22.71 g (86%) of the pure compound as viscous yellow oil.  $^1\text{H}$  NMR (500 MHz,  $\text{CDCl}_3$ )  $\delta$  7.0 (s, 1H, aromatic H), 6.73 (s, 2H, aromatic H), 3.65 (s, 2H, amino H), 1.18 (s, 42H, H from  $^i\text{Pr}$ ).  $^{13}\text{C}$  NMR (125 MHz,  $\text{CDCl}_3$ )

146.95 (aromatic C, 1C), 126.5 (aromatic C, 1C), 124.76 (aromatic C, 2C), 118.0 (aromatic C, 2C), 107 (acetylene C, 2C), 90 (acetylene C, 2C), 19.30 (<sup>i</sup>Pr C, 6C), 12.45 (<sup>i</sup>Pr C, 12C).

### Deprotection of 3,5-bis((triisopropylsilyl)ethynyl)aniline

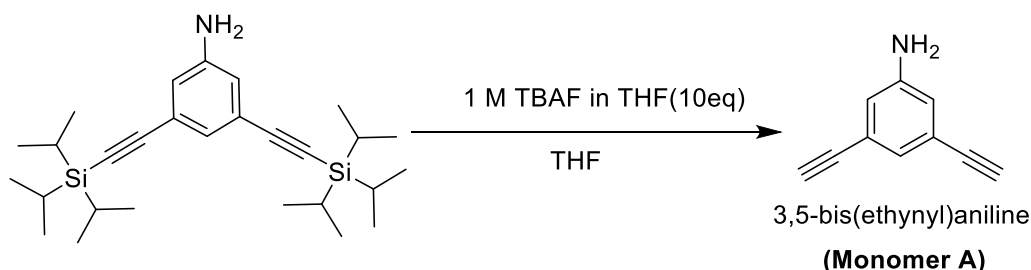

Deprotection of 3,5-bis(triisopropylsilyl)ethynyl)aniline was achieved by desilylation using tetra-*n*-butylammonium fluoride (TBAF) in THF promoted by a small amount of CH<sub>3</sub>OH. <sup>1</sup>H NMR (500 MHz, CDCl<sub>3</sub>) 6.95 (s, 1H, aromatic H), 6.65 (s, 2H, aromatic H), 3.65 (s, 2H, amino H), 2.95 (s, 2H, acetylene H).

### Synthesis of 1-(3,5-dibromophenyl)-3-hexylurea

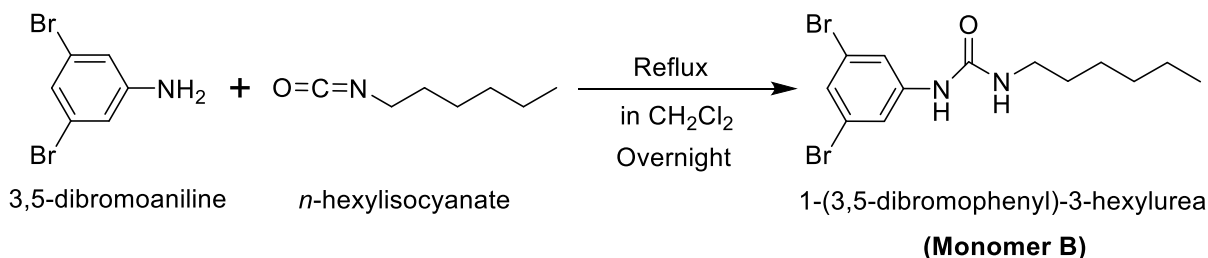

Hexyl isocyanate (3.08 g, 24.2 mmol) was added dropwise to the stirring solution of 3, 5-dibromoaniline, 4.12 (20.72 mmol) in 60 mL of dichloromethane at low temperature using ice bath. After complete addition the reaction mixture was then allowed to stir at room temperature for an hour and then reflux for 6 hours, during which time a precipitate appeared. The solvent was then removed by rotavapor and the resulting urea compound was purified by recrystallization from ethanol at low temperature to obtain urea derivative as a white crystalline

solid.  $^1\text{H}$  NMR (500 MHz,  $\text{CDCl}_3$ )  $\delta$  8.15 (s, 1H, urea H), 7.65 (s, 2H, aromatic H), 7.15 (s, 1H, aromatic H), 5.75 (s, 1H, urea H), 3.10 (m, 2H, H from hexyl), 1.4 (m, 2H, H from hexyl), 1.25 (s, 6H, H from hexyl), 0.75 (s, 3H, H from hexyl).

### **Polymerization procedure of Poly-1 and Poly-2**

All polymerizations were carried out in a glass tube equipped with a three-way stopcock under oxygen. DMF (0.4 mL) and  $\text{Et}_3\text{N}$  (0.6 mL) were added to a mixture of monomers (0.05 mmol),  $\text{Pd}(\text{PPh}_3)_2\text{Cl}_2$  (3.5 mg, 0.005 mmol),  $\text{PPh}_3$  (1.3 mg, 0.005 mmol) and  $\text{CuI}$  (0.95 mg, 0.005 mmol) under argon, and the resulting solution was kept at 80 °C for 20 h. Then, the reaction mixture was poured into a large volume of diethyl ether to precipitate the polymer. It was separated by filtration using a membrane filter and dried under reduced pressure.  $^1\text{H}$  NMR (500 MHz,  $\text{CDCl}_3$ ): 6.10-8.65 (m, amide and ring protons), 0.5-1.5 (m,  $\text{CH}_3$  and  $\text{CH}_2$  protons), 7.60-7.74 (s, 2H, Ar).  $M_{n,\text{SEC}} = 13,500 \text{ g mol}^{-1}$ ,  $M_w/M_n = 2.42$  for **Poly-1**. Yield >90%. **Poly-2** was sequentially obtained by directly reacting Poly-1 with hexyl isocyanate followed by precipitation in methanol.  $M_{n,\text{SEC}} = 6,090 \text{ g mol}^{-1}$ ,  $M_w/M_n = 1.43$ , almost quantitative yield.

**Sample preparation for UV-vis and fluorescent measurements.** 4.4 mg polymer (**Poly-1** or **Poly-2**) was first dissolved in 50 mL DMF and then diluted to 100 mL with distilled water to meet the desired stock concentration of 44  $\text{mg L}^{-1}$ . The prepared stock solution of anion in  $\text{DMF}/\text{H}_2\text{O} = 1:1$  (v/v) was directly mixed with the polymer solution at 1:1 (v/v) with shaking to ensure the polymer concentration of 22  $\text{mg L}^{-1}$  and the anion concentration was adjusted accordingly by dilution from concentrated solution. For the UV-vis and fluorescent analyses, the solution was deposited for several hours (at least 3 h), after which measurements were carried out.

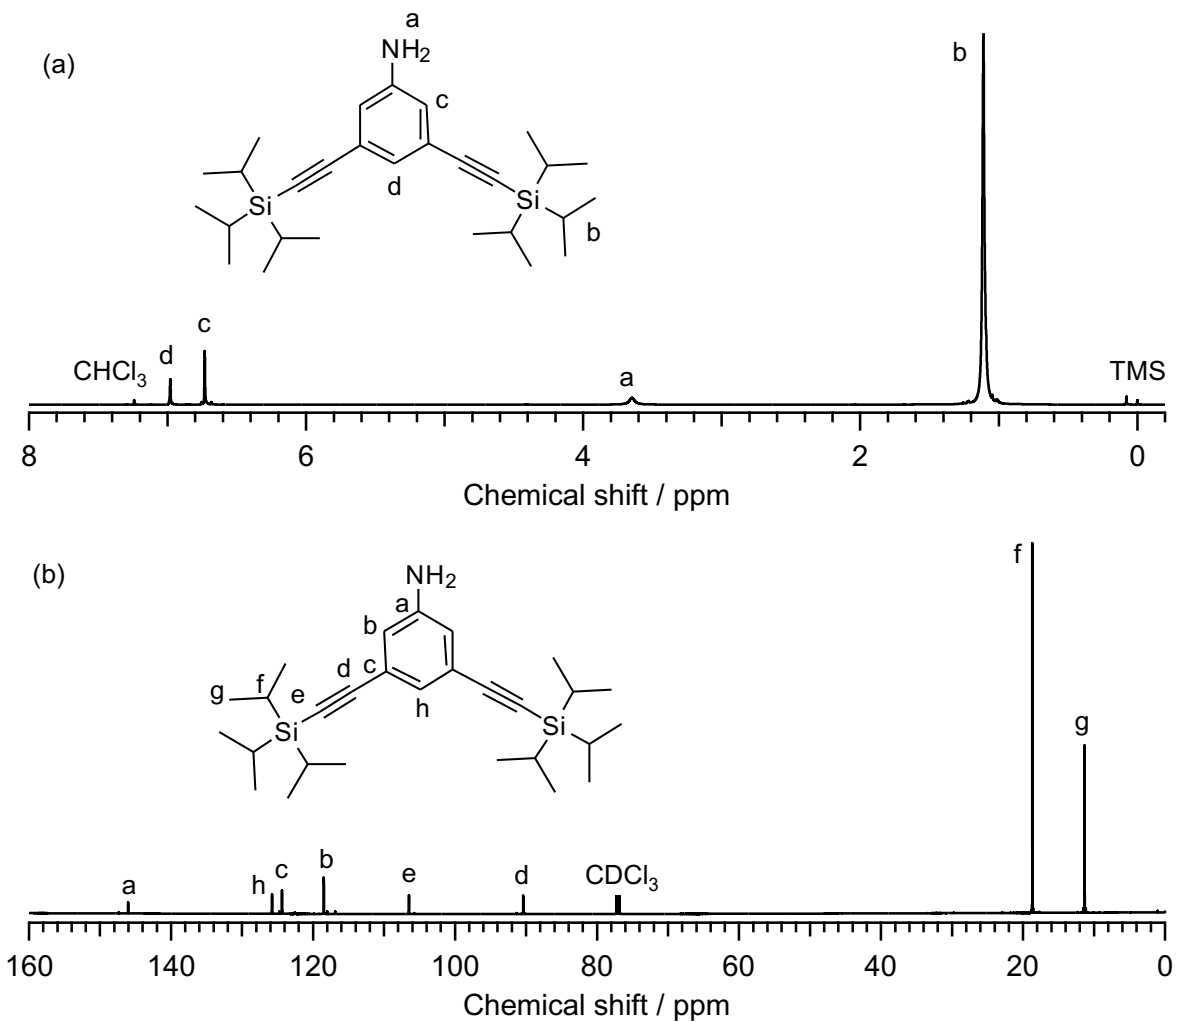

**Figure S1.**  $^1\text{H}$  (a) and  $^{13}\text{C}$  (b) NMR spectra of 3,5-bis(triisopropylsilyl)ethynylaniline in  $\text{CDCl}_3$ .

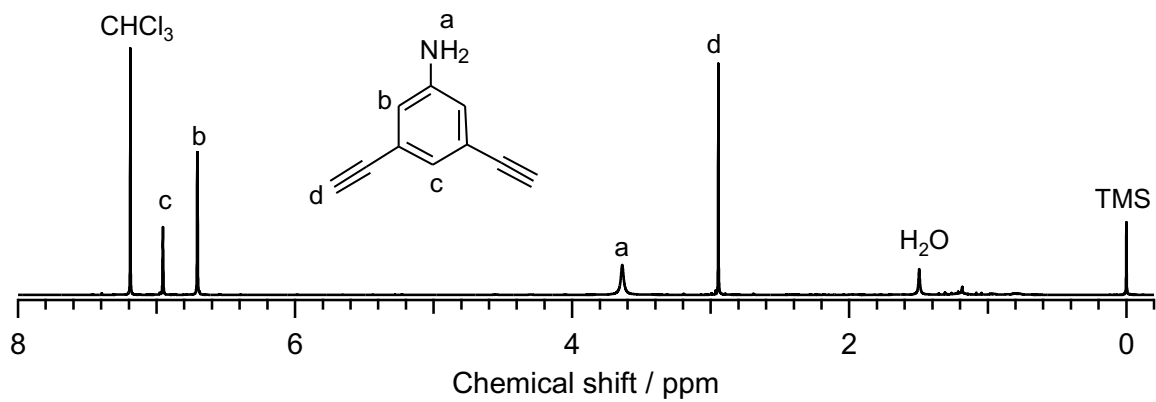

**Figure S2.**  $^1\text{H-NMR}$  spectrum of 3,5-diethynylaniline in  $\text{CDCl}_3$ .

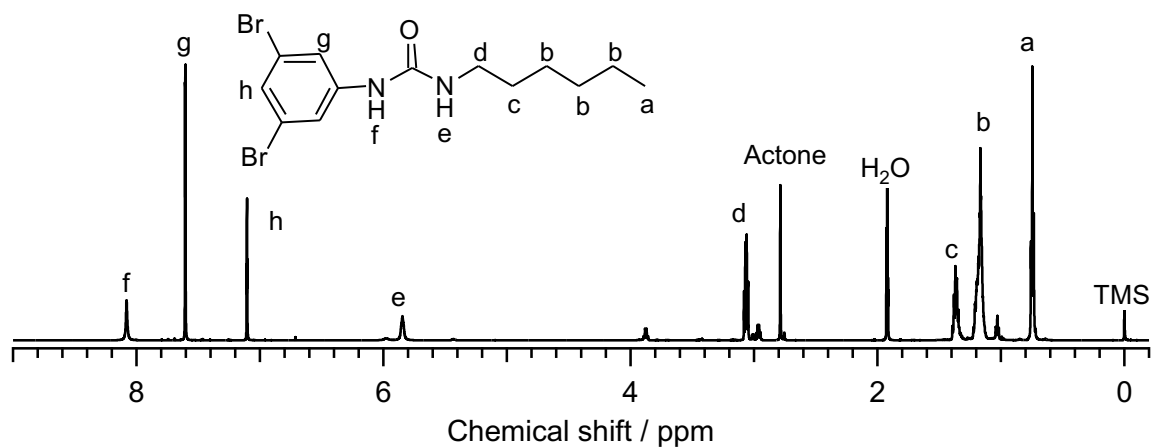

**Figure S3.**  $^1\text{HNMR}$  spectrum of 1-(3,5-dibromophenyl)-3-hexylurea in  $\text{actone-}d_6$ .

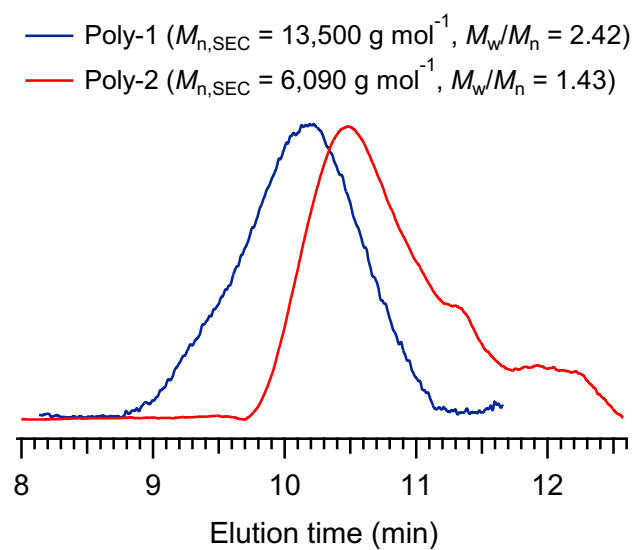

**Figure S4.** SEC traces of **Poly-1** and **Poly-2** (eluent,  $0.01 \text{ mol L}^{-1}$  LiBr in DMF; flow rate,  $0.35 \text{ mL min}^{-1}$ ).



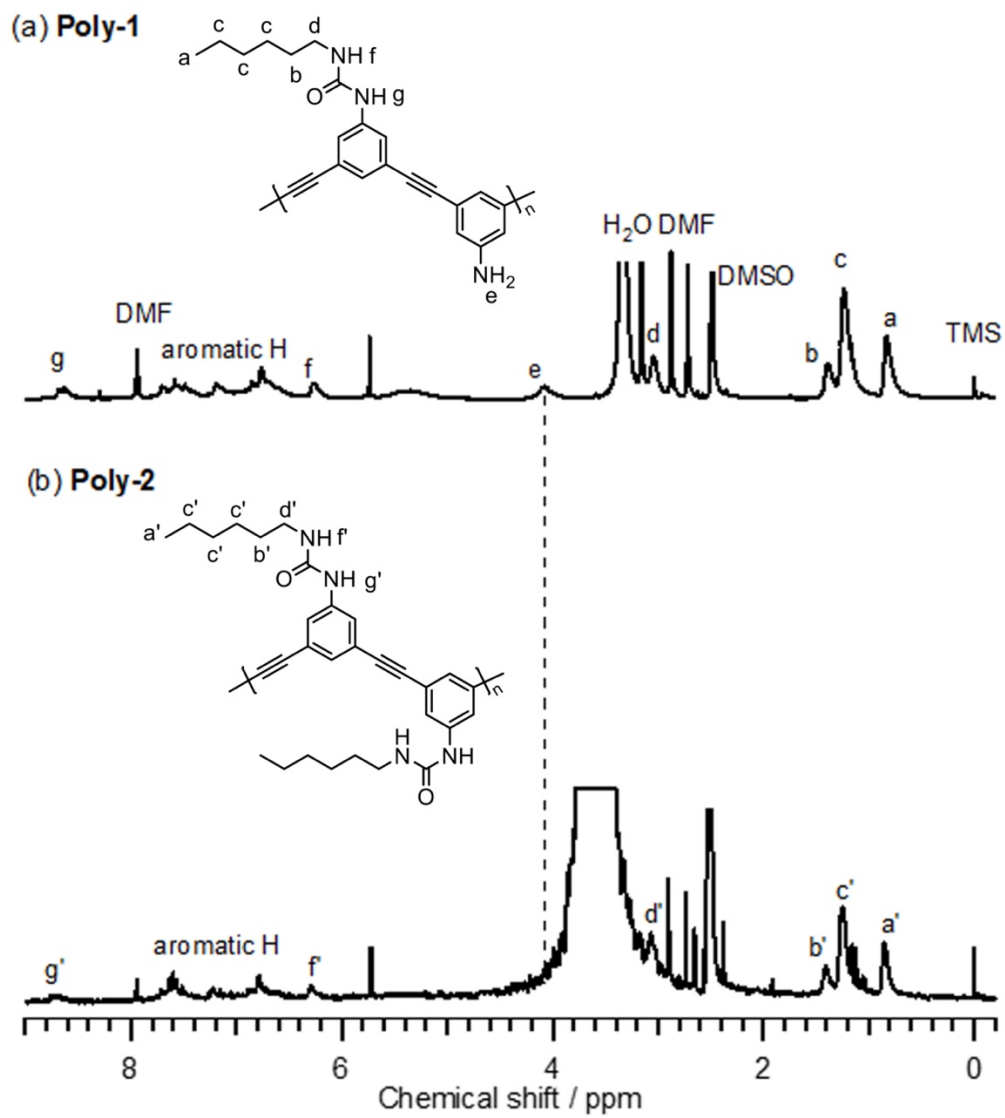

**Figure S5.**  $^1\text{H-NMR}$  spectra of **Poly-1** and **Poly-2** determined in  $\text{DMSO-}d_6$ .

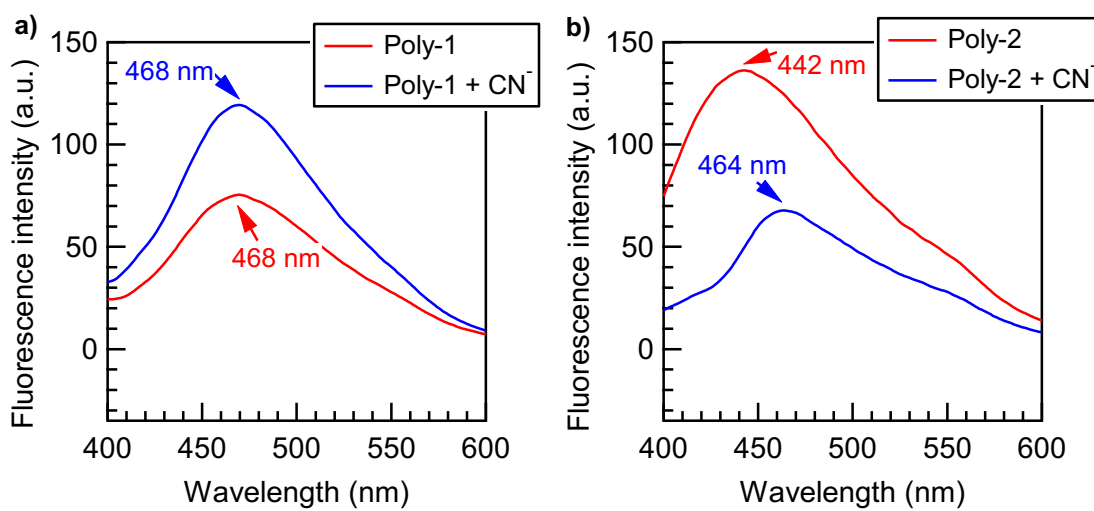

**Figure S6.** Fluorescence spectra of **Poly-1** and **Poly-2** before (red) and after (blue) addition of  $\text{CN}^-$  under the condition of 0.01 mM polymer solution and 1.0 mM anion solution in DMF/H<sub>2</sub>O (v/v = 1:1).

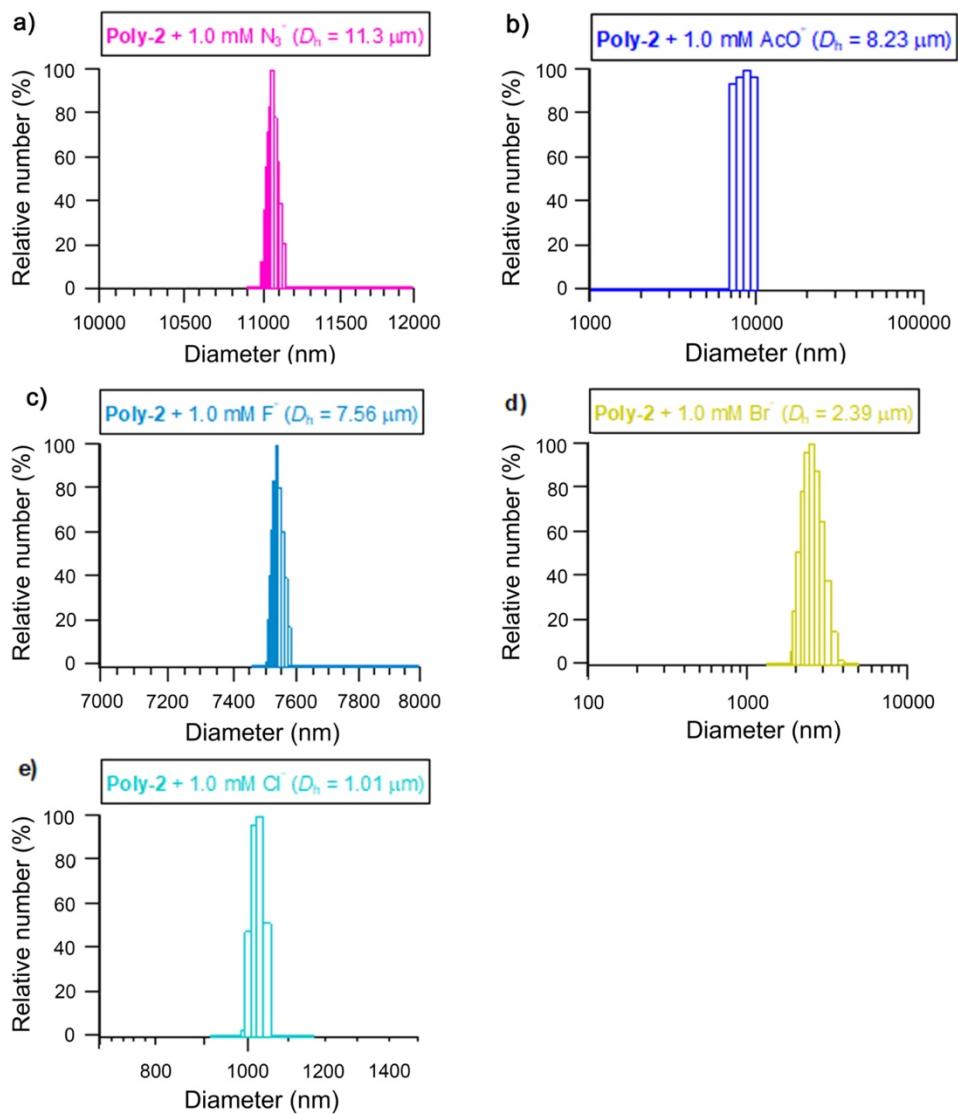

**Figure S7.** Particle size distribution and average hydrodynamic diameter ( $D_h$ ) of **Poly-2** + anion determined by DLS in DMF/H<sub>2</sub>O (v/v = 1:1) mixed solvent at 25 °C under the weight concentration of 22 mg L<sup>-1</sup> for **Poly-2** (the concentration of urea group was 91  $\mu\text{M}$  for **Poly-2**) and the anion concentration of 1.0 mM: (a) **Poly-2** + I<sup>-</sup>, (b) **Poly-2** + AcO<sup>-</sup>, (c) **Poly-2** + F<sup>-</sup>, (d) **Poly-2** + Br<sup>-</sup>, and (e) **Poly-2** + Cl<sup>-</sup>.

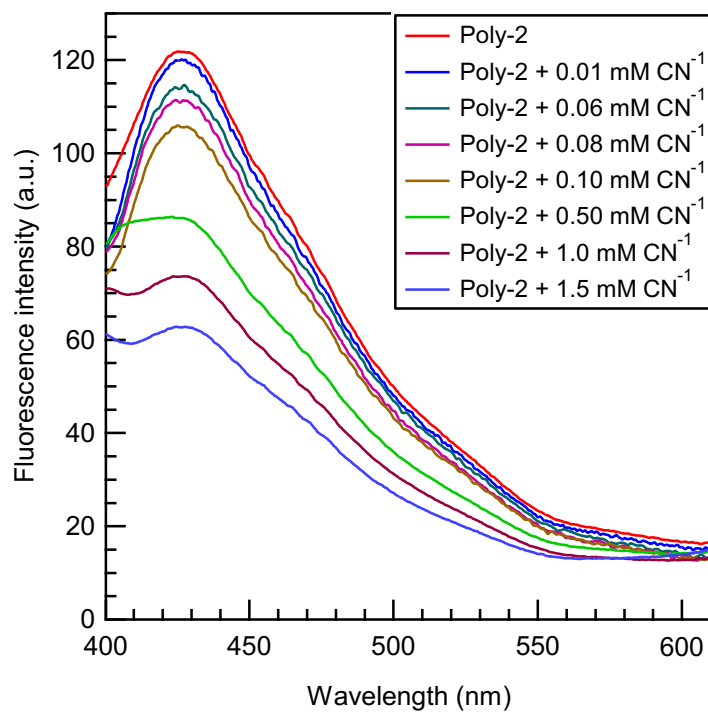

**Figure S8.** Fluorescence spectra of **Poly-2** with cyanide anion at different concentrations under the conditions of **Poly-2** solution at  $22 \text{ mg L}^{-1}$  (the concentration of urea group was  $91 \text{ }\mu\text{M}$ ) in DMF/H<sub>2</sub>O (v/v = 1:1) at  $\lambda_{\text{ex}} = 350 \text{ nm}$ .

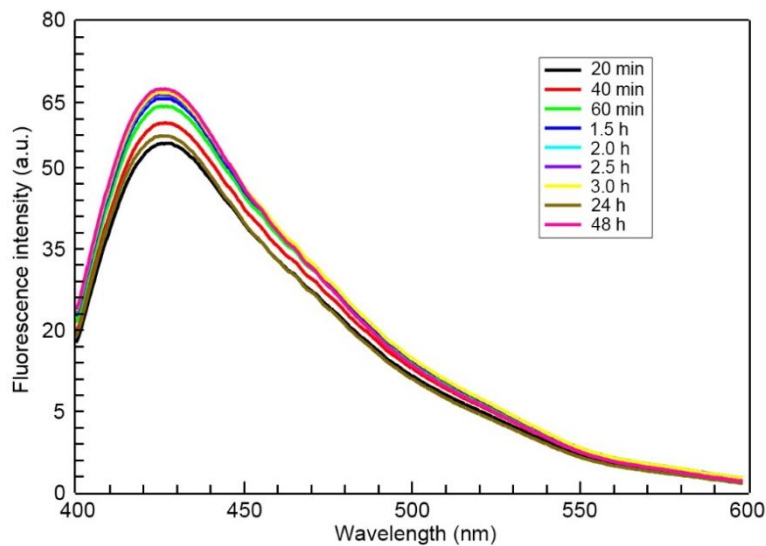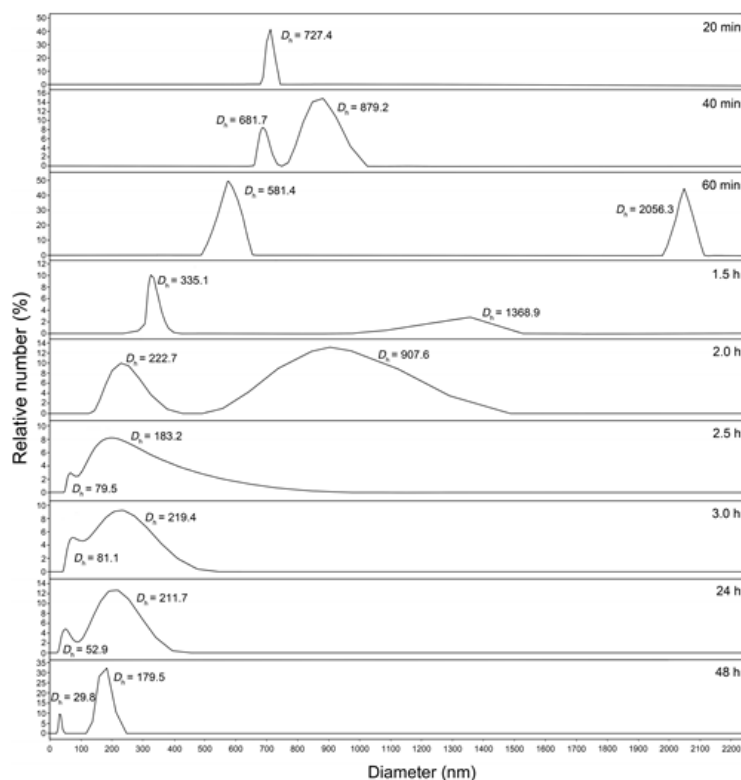

**Figure S9.** Time-dependent fluorescence spectra (above) and particle size distributions (below) of **Poly-2** with cyanide anion under the conditions of **Poly-2** solution at 22 mg L<sup>-1</sup> (the concentration of urea group was 91 μM) in DMF/H<sub>2</sub>O (v/v = 1:1) at  $\lambda_{ex}$  = 350 nm.
